# Supplementary material for: Structural Prediction of the Dimeric Form of the Mammalian Translocator Membrane Protein TSPO: A Key Target for Brain Diagnostics
Source: PubMed Central journal article supplement (PMC6165245; doi:10.3390/ijms19092588), 2018-08-31
Supplement: ijms-19-02588-s001.pdf [file ijms-19-02588-s001.pdf]

# Supplementary Information

## Structural Prediction of the Dimeric Form of the Mammalian Translocator Membrane Protein TSPO: A Key Target for Brain Diagnostics

Juan Zeng<sup>1,2\*</sup>, Riccardo Guareschi<sup>1\*</sup>, Mangesh Damre<sup>3,4\*</sup>, Ruyin Cao<sup>1</sup>, Achim Kless<sup>5</sup>, Bernd Neumaier<sup>6</sup>, Andreas Bauer<sup>7</sup>, Alejandro Giorgetti<sup>1,3\*\*</sup>, Paolo Carloni<sup>1,8</sup>, Giulia Rossetti<sup>1,9,10\*\*</sup>

1. Institute for Advanced Simulations (IAS)-5 / Institute for Neuroscience and Medicine (INM)-9, Forschungszentrum Jülich, Germany
2. Laboratory of Computational Chemistry and Drug Design, Laboratory of Chemical Genomics, Peking University Shenzhen Graduate School, Shenzhen 518055, China
3. Department of Biotechnology, University of Verona, Italy
4. Neurobiology, International School for Advanced Studies (SISSA), Trieste (Italy)
5. Grünenthal Innovation, Translational Science & Intelligence, Grünenthal GmbH, 52078 Aachen, Germany
6. Institute for Neuroscience and Medicine (INM)-5, Forschungszentrum Jülich, Germany
7. Institute for Neuroscience and Medicine (INM)-2, Forschungszentrum Jülich, Germany
8. RWTH Aachen University, Aachen, Germany
9. Jülich Supercomputing Center (JSC), Forschungszentrum Jülich, Germany
10. University Hospital Aachen, RWTH Aachen University, Germany

\*Equally contributes; \*\*corresponding author: g.rossetti@fz-juelich.de; alejandro.giorgetti@univr.it

### 1. Bioinformatics Analysis

|                        |        |     |                                                                               |     |
|------------------------|--------|-----|-------------------------------------------------------------------------------|-----|
| <a href="#">Q9RFC8</a> | RsTSPO | 1   | MNMD <b>WALFLTFLAACGAPATTGA</b> ---LLKPDEWYDNLNKPWWNPPR <b>WVFPLAWTSLYFLM</b> |     |
|                        |        | 57  |                                                                               |     |
| <a href="#">P50637</a> | mTSPO  | 1   | MPESW <b>VPAVGLTLVPSLGGFMGAYFV</b> RGEGLRWYASLQKPSWHPPR <b>WTLAPIWGTLYSAM</b> |     |
|                        |        | 60  |                                                                               |     |
| <a href="#">Q81BL7</a> | BcTSPO | 1   | MFMKKSS <b>IIVFFLTYG</b> --LFYVSSVLFPI <b>DRTWYDALEKPSWTPPGMTIGMIWAVLFLGI</b> | 58  |
|                        |        |     | * . : : . . : : ** * : * : * : *                                              |     |
| <a href="#">Q9RFC8</a> | RsTSPO | 58  | <b>SLAAMRVAQL</b> ----EGSGQ <b>ALAFYAAQLAFNTLWTPVFFGMKRMATALAVVMVWMLFVA</b>   |     |
|                        |        | 112 |                                                                               |     |
| <a href="#">P50637</a> | mTSPO  | 61  | <b>GYGSYIVW</b> KELGGFTEDAM <b>VPLGLYTGQLALNWAWPIFFGARQMGWALADLLLVSGVAT</b>   |     |
|                        |        | 120 |                                                                               |     |
| <a href="#">Q81BL7</a> | BcTSPO | 59  | <b>ALSVAI</b> YNNYGFKPK <b>-T--FWFLFLLNYIFNQAFSYFQFSQKNLFLATVDCLLVAITL</b>    | 115 |
|                        |        |     | .. : : : : : * : * : * : * : *                                                |     |
| <a href="#">Q9RFC8</a> | RsTSPO | 113 | <b>ATMWAFFQLDTWAGVLFV</b> PYLIWATAATGLN <b>FEAMRLNWNRPPEAR</b> ---            | 158 |
| <a href="#">P50637</a> | mTSPO  | 121 | <b>ATTLAWHRVSPPAARLLYPYLA</b> WLAFATVLN <b>YYVWRD</b> NSGRRGGSRLPE            | 169 |
| <a href="#">Q81BL7</a> | BcTSPO | 116 | <b>LLIMFSSNLSK</b> VS <b>AWLLIPYFLWSAFATYLSWTI</b> YSIN-----                  | 153 |
|                        |        |     | .. : : * : * : * : * : *                                                      |     |

**Table S1.** Multiple sequence alignment across mTSPO, RsTSPO, and BcTSPO, as obtained with the ClustalOmega tool [2]. Residues belonging to the transmembrane region are colored in red. Positions which have a single, fully-conserved residue are indicated by “\*”. The conservation between groups of strongly similar properties—scoring > 0.5 in the Gonnet PAM 250 matrix [4]—are indicated by “:” (colon). The conservation between groups of weakly similar properties—scoring ≤ 0.5 in the Gonnet PAM 250 matrix [4]—are indicated by “.” (period).

| <b>A) Protein Orientation in Membrane</b> |                                            |                  |                 |
|-------------------------------------------|--------------------------------------------|------------------|-----------------|
|                                           | <b>mTSPO_NMR_monomer<br/>(PDBiD: 2MGY)</b> | <b>mTSPO_NMR</b> | <b>mTSPO_Rs</b> |
| Depth/Hydrophobic Thickness (Å)           | 28.6 ± 1.6                                 | 14.6 ± 1.2       | 21.8 ± 3.6      |
| Tilt angle (°) dimer                      | -                                          | 70°± 0°          | 2°± 2°          |
| Tilt angle (°) monomer A                  | 12° ± 1°                                   | 25°±0°           | 14°±0°          |
| Tilt angle (°) monomer B                  | -                                          | 44°±0°           | 14°±0°          |

| <b>B) Membrane Embedding</b>                   |                                                                             |                                                                    |                                                            |                                                                         |                                                                   |
|------------------------------------------------|-----------------------------------------------------------------------------|--------------------------------------------------------------------|------------------------------------------------------------|-------------------------------------------------------------------------|-------------------------------------------------------------------|
|                                                | <b>mTSPO_NMR_monomer<br/>(PDBiD: 2MGY)</b>                                  | <b>mTSPO_NMR</b>                                                   |                                                            | <b>mTSPO_RS</b>                                                         |                                                                   |
| Subunit                                        |                                                                             | <b>A</b>                                                           | <b>B</b>                                                   | <b>A</b>                                                                | <b>B</b>                                                          |
| Segments/<br>embedded<br>residues              | 7-26, 46-63,<br>82-102, 106-124, 134-153                                    | 7-18, 20-21,<br>47,<br>51-68, 70-<br>71,<br>76-90, 118,<br>121-139 | 6-17, 19,<br>42-57, 60,<br>79-93, 111-<br>125, 139-<br>150 | 8-23, 42, 44,<br>47-62, 83-98,<br>107-123, 126,<br>135-152              | 8-23, 42, 44,<br>47-62, 83-98,<br>107-123, 126,<br>136-153, 155   |
| Transmembrane<br>helices (residue<br>interval) | I (7- 26),<br>II(46- 63),<br>III (82- 102),<br>IV(106-124),<br>V (134- 153) | Not<br>recognized                                                  | Not<br>recognized                                          | I(8-23), II(48-<br>62), III(83-<br>98), IV(107-<br>123), V(136-<br>152) | I(8-23), II(48-<br>62), III(83-98),<br>IV(107-123),<br>V(136-152) |

**Table S2.** (A) Orientation of the proteins in the membrane is evaluated with the hydrophobic thickness and the tilt angle computed with the PPM server [5,6]. The hydrophobic thickness indicates the calculated maximal penetration depth of the protein in the lipid hydrophobic core. The tilt angle is the angle between the axis normal to the membrane's surface and the axis of each studied system. The errors for the evaluation of the hydrophobic thickness and the tilt angle correspond to fluctuations of 1 kcal/mol in the energy of the embedded protein [5,6]. (B) Membrane embedding. The table consists of two parts: a list of residues penetrating into the hydrocarbon core of the lipid bilayer for each subunit and parts of transmembrane alpha-helices or embedded into the hydrocarbon core [5,6].



|        |      |   |   |                   |      |
|--------|------|---|---|-------------------|------|
| BcTSPO | 4RYN | 1 | - | X-ray diffraction | 2.01 |
| BcTSPO | 4RYM | 1 | - | X-ray diffraction | 2.8  |
| BcTSPO | 4RYR | 1 | - | X-ray diffraction | 1.7  |

**Table S4.** TSPO deposited structures in the Protein Data Bank. \* mTSPO = *Mus musculus* TSPO, \*\* RsTSPO = *Rhodobacter sphaeroides* TSPO, \*\*\* BcTSPO = *Bacillus cereus*

| System | Acronym           | Description                                                                                                                                                                               |
|--------|-------------------|-------------------------------------------------------------------------------------------------------------------------------------------------------------------------------------------|
| 1)     | mTSPO_NMR         | Dimer model of mTSPO based on the NMR study reported in Ref. [8]                                                                                                                          |
| 2)     | mTSPO_NMR_monomer | Monomer of mTSPO studied with MD simulation and used to build 1). The coordinates are taken from the PDBiD: 2MGY[9]                                                                       |
| 3)     | mTSPO_Rs          | Dimer model of mTSPO built by us, based on the X-ray coordinates of prokaryotic RsTSPO [10]                                                                                               |
| 4)     | mTSPO_Rs_monomer  | Monomer of the structure described in system 3)                                                                                                                                           |
| 5)     | BcTSPO            | TSPO protein from the bacterium <i>Bacillus cereus</i> (PDBiD: 4RYI [11]), used to compare the binding of PK11195 with the binding of the same ligand observed in system 1) and system 2) |
| 6)     | RsTSPO            | TSPO protein from the bacterium <i>Rhodobacter sphaeroides</i> (PDBiD: 4UC1 [10]), used to build system 3)                                                                                |

**Table S5.** Acronyms and descriptions for the systems analyzed.

| <b>mTSPO_Rs Binding Site Residues</b>                                                                                                   |                                                                                                                                                                                                                                           |                                                                                                                                       |                                                                                                                                                                                                                                           |
|-----------------------------------------------------------------------------------------------------------------------------------------|-------------------------------------------------------------------------------------------------------------------------------------------------------------------------------------------------------------------------------------------|---------------------------------------------------------------------------------------------------------------------------------------|-------------------------------------------------------------------------------------------------------------------------------------------------------------------------------------------------------------------------------------------|
| <b>Subunit A</b>                                                                                                                        |                                                                                                                                                                                                                                           | <b>Subunit B</b>                                                                                                                      |                                                                                                                                                                                                                                           |
| <b>4 Å</b>                                                                                                                              | <b>6 Å</b>                                                                                                                                                                                                                                | <b>4 Å</b>                                                                                                                            | <b>6 Å</b>                                                                                                                                                                                                                                |
| G18, M21, G22, F25, V26, R27, G28, E29, Y34, H43, P44, L49, A50, W53, Y57, N92, W95, P96, F99, F100, L112, W143, A147, L150, N151, V154 | P15, L17, G18, G19, M21, G22, A23, Y24, F25, V26, R27, G28, E29, G30, Y34, L37, K39, P40, H43, P44, R46, L49, A50, W53, G54, Y57, N92, W93, W95, P96, F99, F100, L112, W143, F146, A147, T148, L150, N151, V154                           | G18, G22, Y34, R46, L49, A50, W53, L56, Y57, N92, W93, W95, P96, F99, F100, L112, V115, Y140, L141, A147, L150                        | L17, G18, G19, M21, G22, A23, F25, Y34, H43, P44, R46, W47, L49, A50, P51, W53, L56, Y57, M60, Q88, L89, L91, N92, W93, A94, W95, P96, P97, F99, F100, L112, V115, Y140, L141, W143, F146, A147, L150, N151                               |
| <b>mTSPO_NMR Binding Site Residues</b>                                                                                                  |                                                                                                                                                                                                                                           |                                                                                                                                       |                                                                                                                                                                                                                                           |
| <b>Subunit A</b>                                                                                                                        |                                                                                                                                                                                                                                           | <b>Subunit B</b>                                                                                                                      |                                                                                                                                                                                                                                           |
| <b>4 Å</b>                                                                                                                              | <b>6 Å</b>                                                                                                                                                                                                                                | <b>4 Å</b>                                                                                                                            | <b>6 Å</b>                                                                                                                                                                                                                                |
| G19, A23, V26, R27, K39, S41, H43, P44, P45, R46, L49, A50, I52, W53, W95, W107, A108, A110, D111, L114, W143, F146, A147, L150, N151   | P15, G18, G19, F20, G22, A23, Y24, F25, V26, R27, G30, L31, K39, P40, S41, H43, P44, P45, R46, W47, T48, L49, A50, I52, W53, W93, W95, P96, I98, A102, W107, A108, L109, A110, D111, L112, L114, W143, F146, A147, T148, L150, N151, Y152 | G19, A23, V26, R27, K39, S41, H43, P44, P45, R46, L49, A50, I52, W53, W95, W107, A108, A110, D111, L114, W143, F146, A147, L150, N151 | P15, G18, G19, F20, G22, A23, Y24, F25, V26, R27, G30, L31, K39, P40, S41, H43, P44, P45, R46, W47, T48, L49, A50, I52, W53, W93, W95, P96, I98, A102, W107, A108, L109, A110, D111, L112, L114, W143, F146, A147, T148, L150, N151, Y152 |

**Table S6.** List of the residues within 4 Å or 6 Å from the PK11195 ligand in mTSPO\_Rs and mTSPO\_NMR.

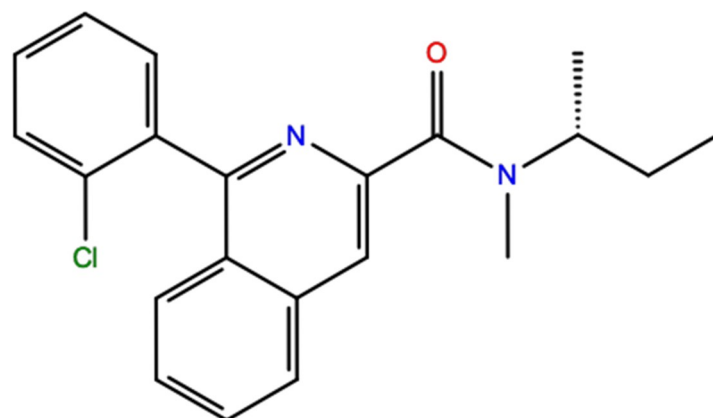

**Figure S1.** Chemical structure of 1-(2-chlorophenyl)-N-methyl-N-(1-methylpropyl)-3-isoquinolinecarboxamide (PK11195).

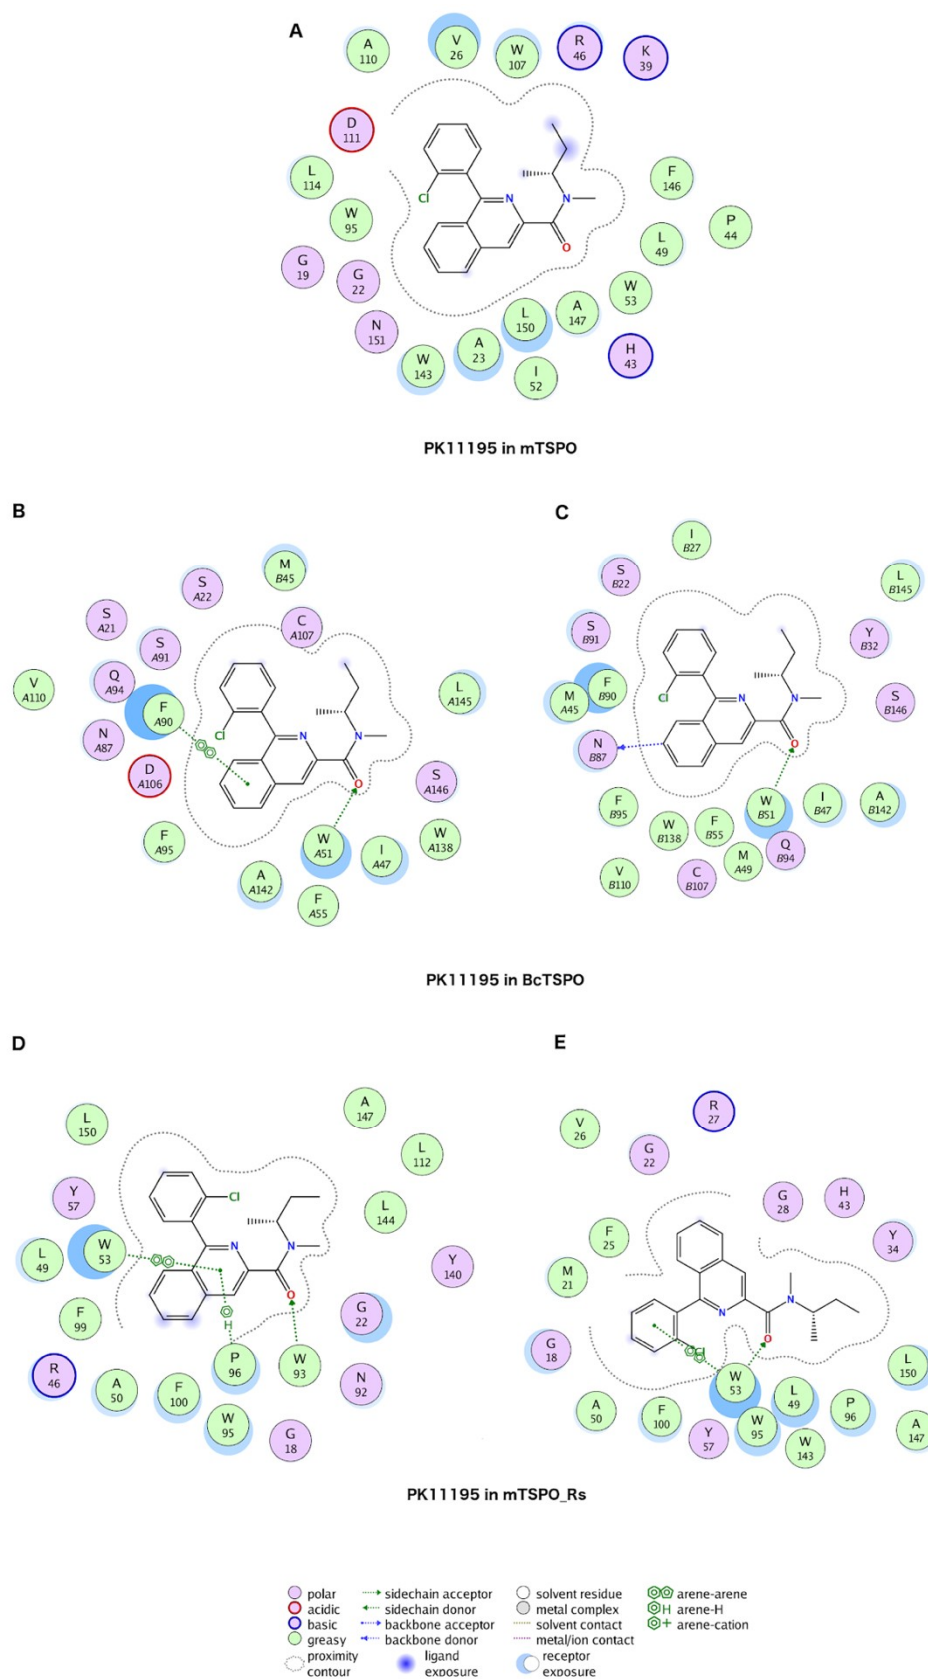

**Figure S2.** Binding pose of PK11195 in the binding pocket of mTSP0\_NMR\_monomer structure [9] (A), BcTSP0 dimeric X-ray structure [11] (B,C) and mTSP0\_Rs (D-E). In (A), only hydrophobic contacts are present. In (B,C), the two binding pockets are not identical. However, the ligand is stabilized in both cases by H-bond with W51. In one subunit, also a  $\pi$ -stacking contact is detected with F90. In (D,E), the ligand establishes one H-bond with either W93 in one subunit (D) or W53 (E) side chain. The isoquinoline moiety establishes  $\pi$ -stacking with W53 and W96.

| TRACER                               | BINDING POSE                                                                                                                                                                                                                                                                                                                                                                                                                                                                                                                                                                                                                                                                                                                                                                                                                                                                                                                                                                                                                                                                                                                                                                                                                                                                                                                        |
|--------------------------------------|-------------------------------------------------------------------------------------------------------------------------------------------------------------------------------------------------------------------------------------------------------------------------------------------------------------------------------------------------------------------------------------------------------------------------------------------------------------------------------------------------------------------------------------------------------------------------------------------------------------------------------------------------------------------------------------------------------------------------------------------------------------------------------------------------------------------------------------------------------------------------------------------------------------------------------------------------------------------------------------------------------------------------------------------------------------------------------------------------------------------------------------------------------------------------------------------------------------------------------------------------------------------------------------------------------------------------------------|
| LEGEND                               | <p> <span style="color: purple;">●</span> polar      <span style="color: green;">→</span> sidechain acceptor      <span style="border: 1px solid gray; border-radius: 50%; padding: 2px;"> </span> solvent residue      <span style="color: green;">⊗</span> arene-arene<br/> <span style="color: red;">●</span> acidic      <span style="color: green;">←</span> sidechain donor      <span style="border: 1px solid gray; border-radius: 50%; padding: 2px;"> </span> metal complex      <span style="color: green;">⊗H</span> arene-H<br/> <span style="color: blue;">●</span> basic      <span style="color: blue;">→</span> backbone acceptor      <span style="color: green;">⋯</span> solvent contact      <span style="color: green;">⊗+</span> arene-cation<br/> <span style="color: lightgreen;">●</span> greasy      <span style="color: blue;">←</span> backbone donor      <span style="color: red;">⋯</span> metal/ion contact      <span style="border: 1px solid blue; border-radius: 50%; padding: 2px;"> </span> receptor exposure<br/> <span style="border: 1px dashed gray; border-radius: 50%; padding: 2px;"> </span> proximity contour      <span style="color: blue;">●</span> ligand exposure      <span style="border: 1px solid blue; border-radius: 50%; padding: 2px;"> </span> receptor exposure </p> |
| 1. AC-5216 (Similar scaffold as DAC) |                                                                                                                                                                                                                                                                                                                                                                                                                                                                                                                                                                                                                                                                                                                                                                                                                                                                                                                                                                                                                                                                                                                                                                                                                                                                                                                                     |
| 2. CB148                             |                                                                                                                                                                                                                                                                                                                                                                                                                                                                                                                                                                                                                                                                                                                                                                                                                                                                                                                                                                                                                                                                                                                                                                                                                                                                                                                                     |



3. CLINME

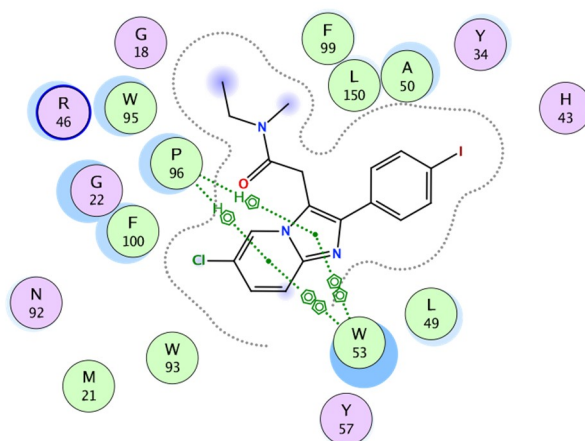

4. DPA-714 (Similar scaffold as DPA-713)

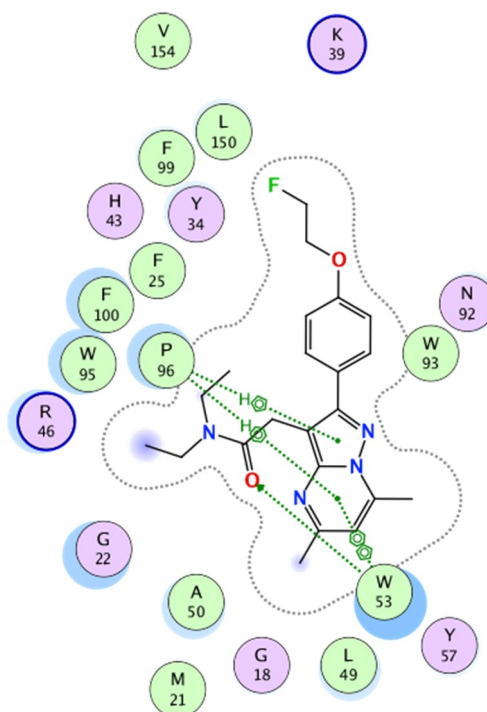

5. FEDAA1106  
(Similar scaffold as  
DAA1106)

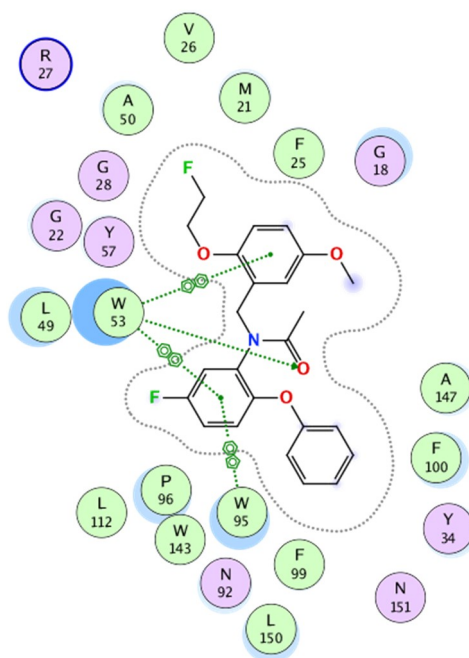

6. FGE-180

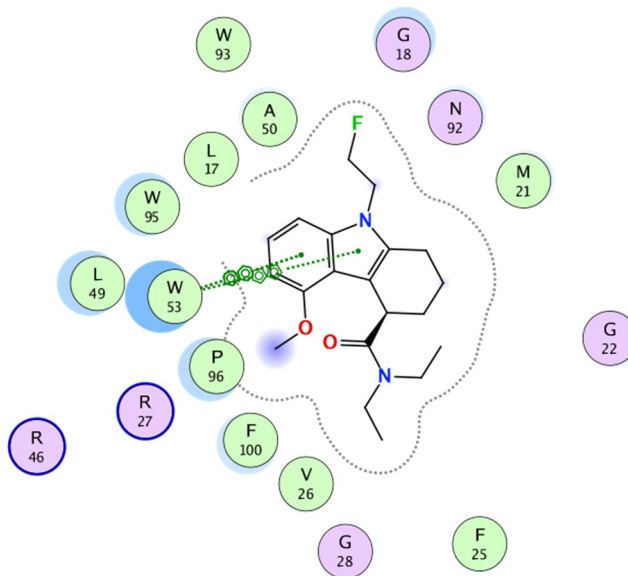

|                                                       |  |
|-------------------------------------------------------|--|
| <p>7. PBR111(Similar scaffold as PBR06 and PBR28)</p> |  |
| <p>8. Protoporphyrin IX</p>                           |  |
| <p>9. Ro5-486</p>                                     |  |

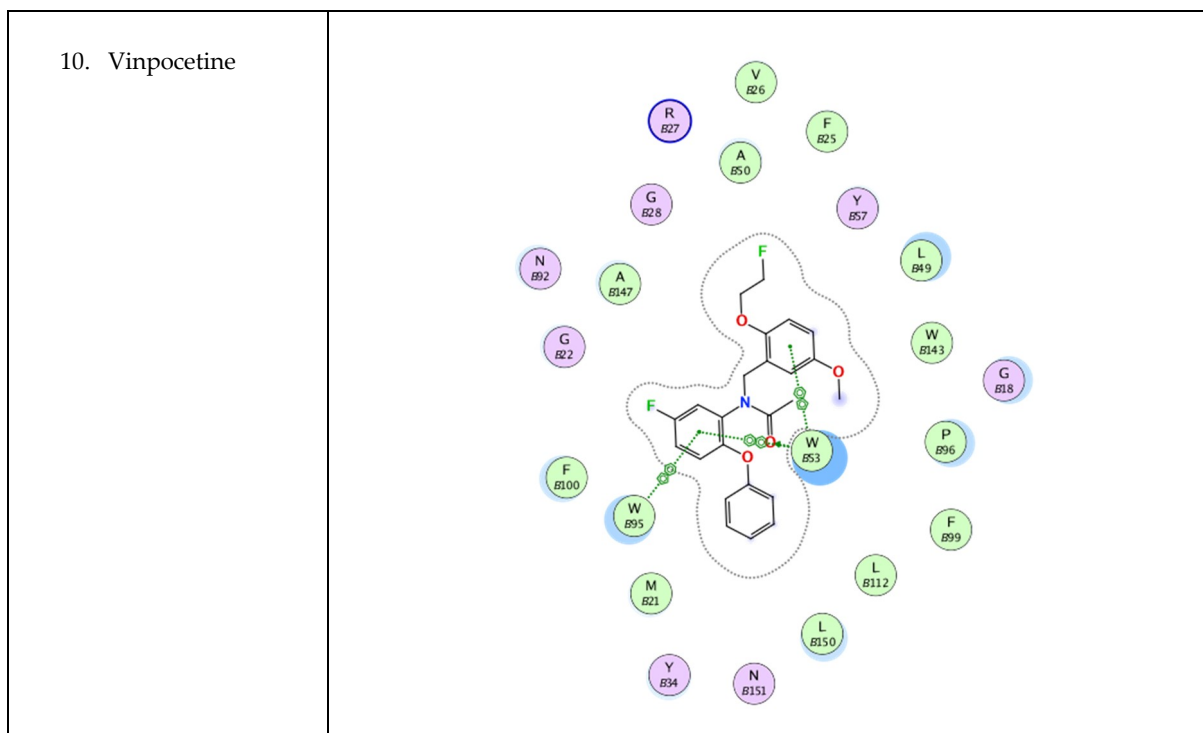

**Table S7.** Predicted binding poses of ligands known to bind to mammalian TSPO with nM affinity [12]: these are AC-5216, CB148, CLINME, DPA-714, FEDAA1106, FGE-180, PBR111, protoporphyrin IX, Ro5-486, and vinpocetine. The ligands have been docked in the structure of mTSPO\_Rs using the Induced-fit docking algorithm implemented in the MOE code [13,14]. Overall, we notice that the main protein-ligand interactions involve W53, W95, and P96, through  $\pi$ -stacking or H-bond interactions as in PK11195. In contrast to PK11195, the main difference that can be noticed is that the residue W95, belonging to the W95XXP97XF99 motif, directly establishes  $\pi$ -stacking interactions with several ligands (namely, CB148, FEDAA1106, protoporphyrin IX, and vinpocetine). Please notice that water molecules are not considered here. During the MD simulations of TSPO\_NMR monomer we did observe the participation of water molecules in the binding of the ligand to the binding pocket (Figure S11). Therefore, we cannot exclude that water molecules might also participate to the binding of those ligands in our model.

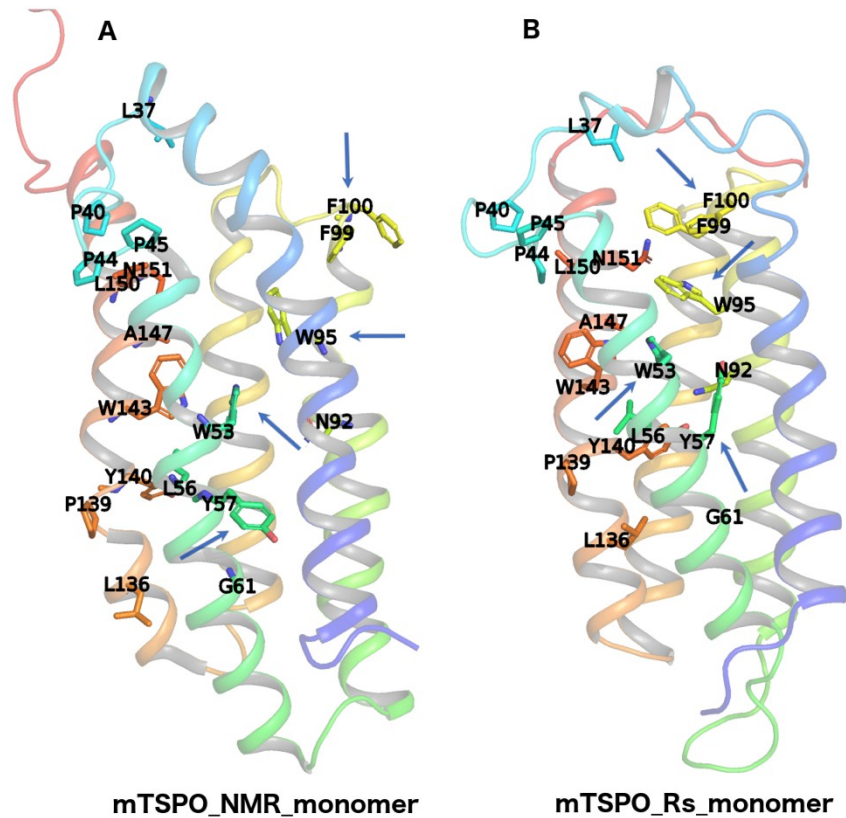

**Figure S3.** (A) mTSPO\_NMR\_monomer structure (PDBiD: 2MGY) [9]. (B) mTSPO\_Rs\_monomer structure. The side chains of highly-conserved residues are shown. The arrows indicate the residues with the largest variations in the side chain orientation between the two structures.

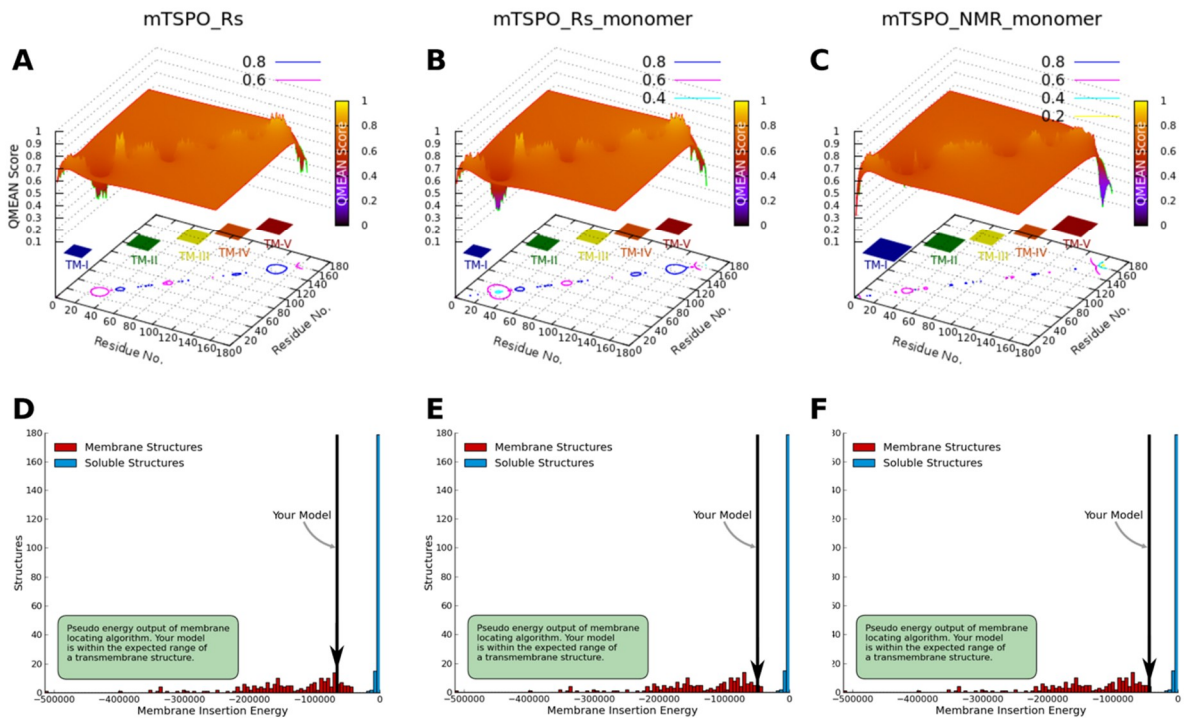

**Figure S4.** Evaluation of the membrane insertion of different mTSPO structures using the QMEANBrane [15] scoring function. QMEAN is a composite scoring function able to derive local (i.e., per residue) absolute quality estimates on the basis of one single model. QMEAN range from 1 (best score) to zero (the worst). QMEANBrane is

the version of QMEAN specialized for the evaluation of membrane proteins' structure quality. (A–C) show the QMEANBrane score plot for mTSPO\_Rs, mTSPO\_Rs\_monomer, and mTSPO\_NMR\_monomer, respectively. The polygons represent the location of TM-I to TM-V helices and the contour lines represents the QMEAN score on XY plane diagonal. (D–F) show the membrane insertion energy plot for mTSPO\_Rs, mTSPO\_Rs\_monomer, and mTSPO\_NMR\_monomer, respectively. The arrow represents the membrane insertion energy (lower values indicate better membrane embedding of the receptor). Plots (D) and (E) show better QMEANBrane scores than plot (F). The poor membrane embedding of the dimer mTSPO\_NMR (Figure 2B in the main text) hampers any QMEANBrane-based calculation and, therefore, it is not possible to report the results for this structure in this picture.

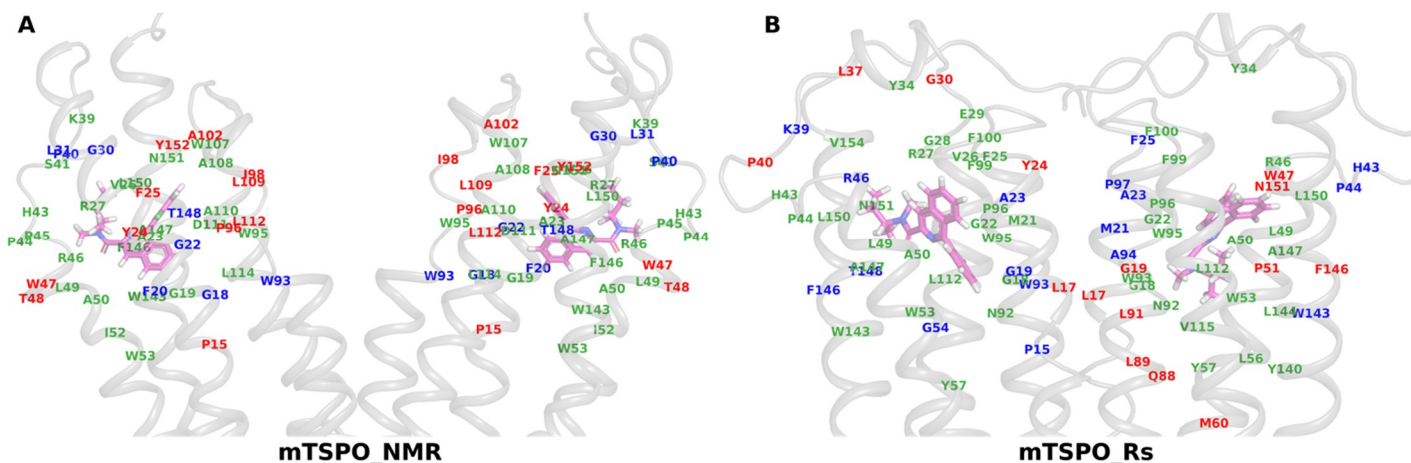

**Figure S5.** Residues within 4Å (green), 5Å (blue), and 6Å (red) from the PK11195 ligand (in pink) in mTSPO\_NMR (A) and mTSPO\_Rs (B).

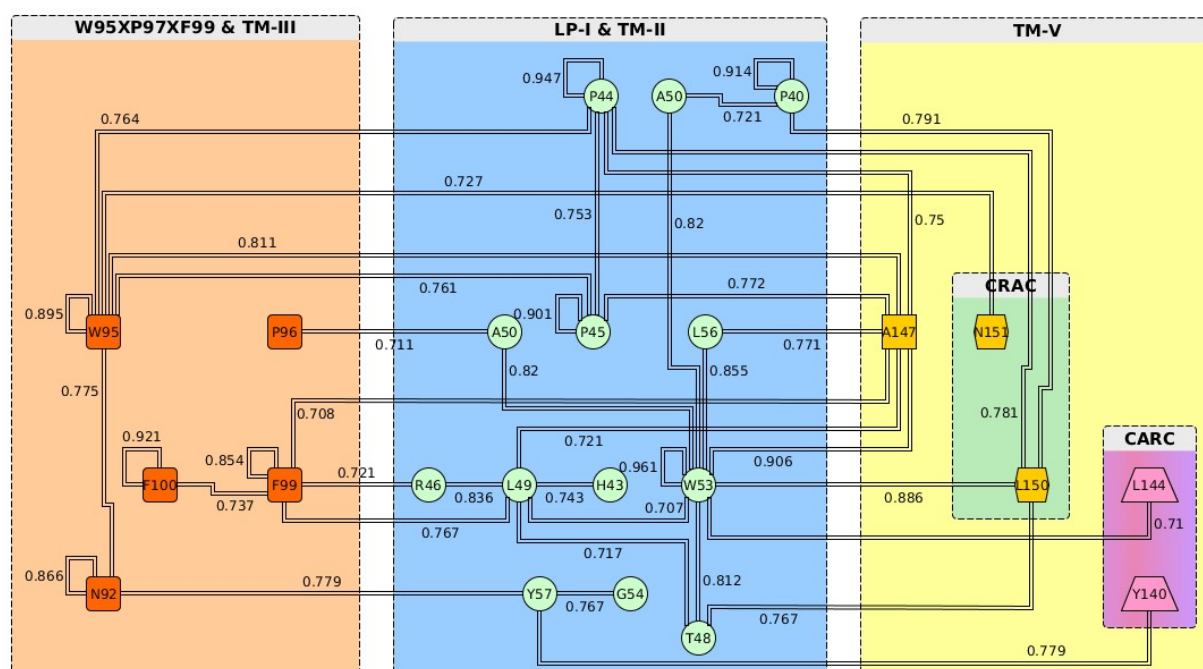

**Figure S6.** Residue pairs of coevolution and their pairwise  $\chi^2$  scores, defined in [1]. The cutoff value on the  $\chi^2$  score [1] is greater than 0.7 to identify the major components of pairwise coevolution. The analysis has been performed using the CoeViz code [3].

## 2. Molecular Dynamics Simulations



Seven-hundred nanosecond MD simulations were performed on mTSPO\_NMR\_monomer in the free state and in complex with the PK11195 ligand (in this section, apo and holo, respectively), starting from the deposited NMR structure [9]. The root-mean square deviation of the backbone atoms (N, C $\alpha$ , C atoms, bb-RMSD) of mTSPO\_NMR\_monomer (excluded the highly flexible M1-W5 region located at N-tail and S159-E169 region located at the C-tail), LP-I (residues ranging from 37 to 45), LP-II (residue ranging from 72 to 75), LP-III (residues ranging from 100 to 103), LP-IV (residues ranging from 129 to 131), and PK11195 are plotted in Figure S7. The plots of these bb-RMSDs, as well as of the secondary structure, as a function of simulated time, suggest that the two systems equilibrate after about 400 ns (Figure S7 and Figure S8). All the analyses hereafter reported are, therefore, performed on the equilibrated part of our simulations.

**Overall structural features.** The average values for bb-RMSD of apo and holo mTSPO\_NMR\_monomer are 3.8 Å and 4.9 Å, respectively (Figure S7). This points to a higher flexibility of the holo structure with respect to the apo one. Notably, this flexibility is also reflected at the level of the secondary structure elements. The bb-RMSD of each helix is higher for holo mTSPO\_NMR\_monomer with respect to that in the apo structure. The secondary structure is mostly preserved for both apo and holo structures (Figure S8), with the exception of TM-II of the holo mTSPO\_NMR\_monomer, where a loss of about 10% of  $\alpha$ -helix is observed with respect to the apo structure. The flexibility analyses were carried out by calculating the so-called PAD index [16]. The holo structure appears globally more flexible than the apo (Figure S9). The bending of each helix as a function of simulated time is presented in the main text (Figure 4).

**Binding site analysis.** The NMR binding pose of PK11195 is fairly preserved during the simulation (RMSD calculated over ligand and backbone atoms of the binding site is 4.9 Å relative to the starting configuration of the simulation). The residues in contact with PK11195 in the simulation are: F20, **A23**, L31, H43, P44, **R46**, **L49**, W53, N92, **W95**, **I98**, F99, W107, A109, **A110**, L113, and L114 (the residues in boldface have a contact percentage with the ligand higher than 90%, see Figure S10). The contacts with **A23**, **L49**, **W107**, **A110**, and **L114**, present in the deposited NMR ensemble [9], are retained throughout the simulation. On the contrary, the contacts between PK11195 and V26, A50, I52, A147, and L150, also present in the NMR ensemble [9], are lost during the simulation. The interactions between the ligand and the binding pocket are only hydrophobic (Figure S10 and Figure S11). This is consistent with the findings reported in ref. [9]. However, transient H-bonds are established within the water molecules with a total occurrence of about 74% (Figure S11).

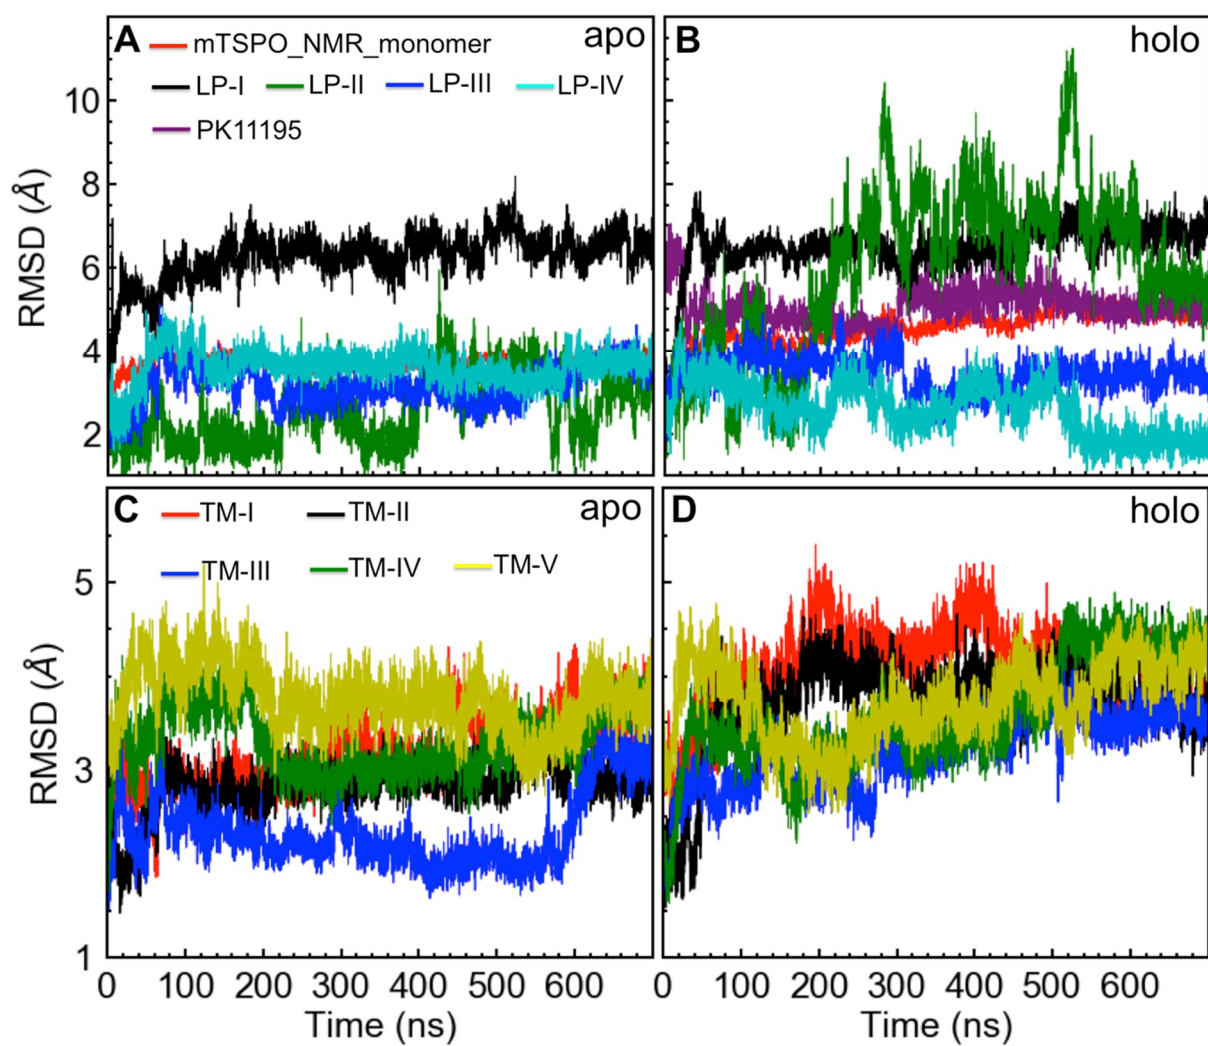

**Figure S7** bb-RMSD of apo and all its loops (A), of holo, all its loops, and PK11195 (B), of each helix of apo (C) and of each helix of holo (D), plotted as function of the simulation time. The bb-RMSD is computed with respect to the 13th frame from the NMR ensemble with PDBiD: 2MGY [9].



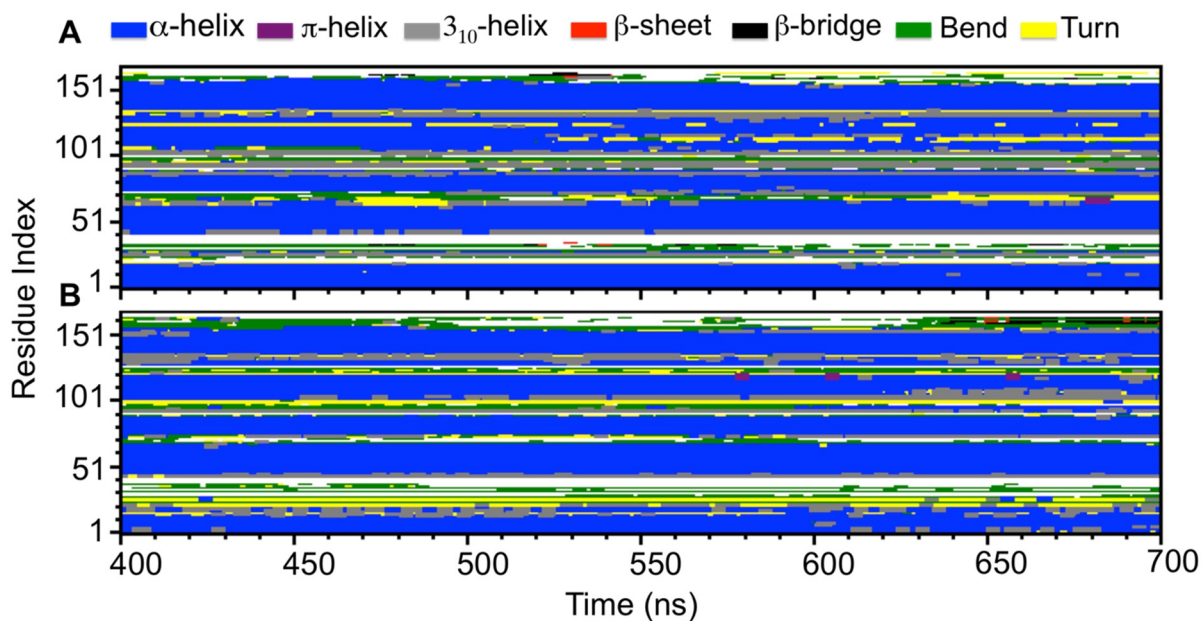

**Figure S8.** Secondary structures of apo (A) and holo (B) plotted as a function of the simulation time.

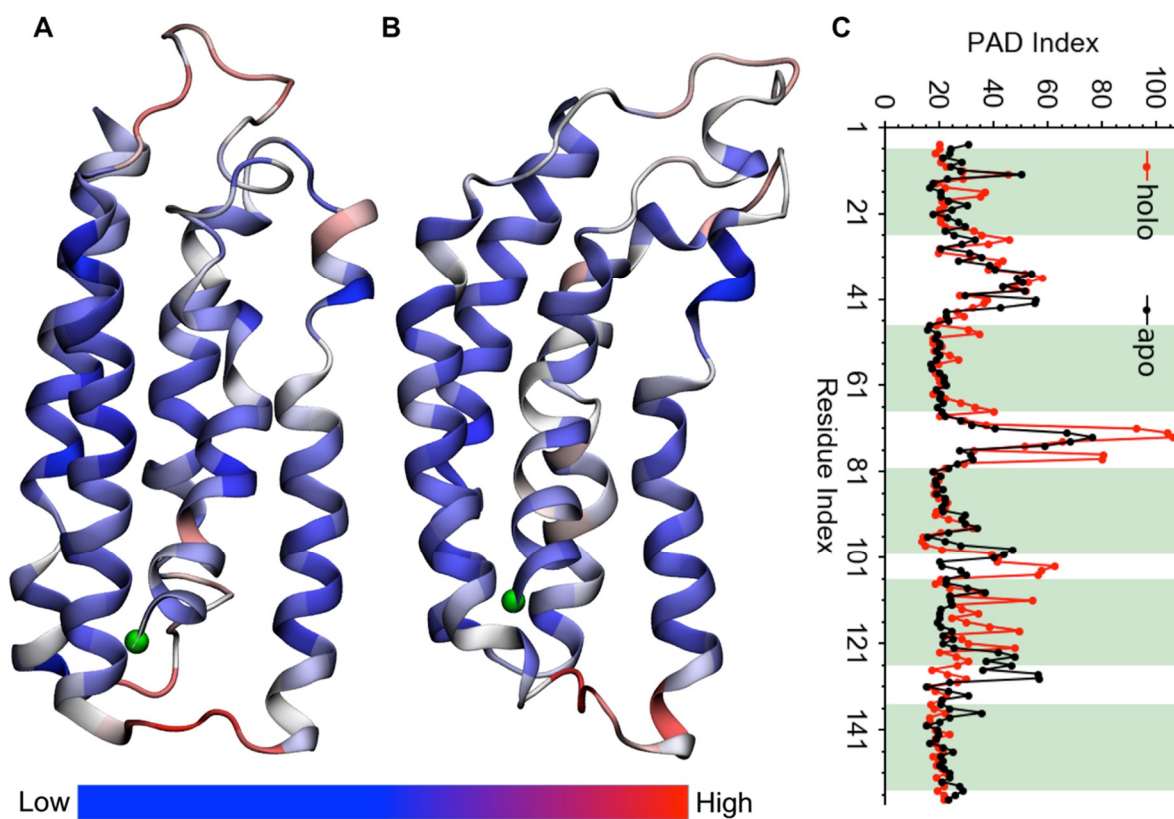

**Figure S9.** MD representative of apo (A) and holo (B) colored according to their PAD. The N-terminus is indicated by a green sphere. (C) Plot of the PAD index of for each residue of the two systems. The helical regions present in the mTSPO structure taken from the NMR ensemble with PDBiD: 2MGY[9] are represented by the green shadow fields.

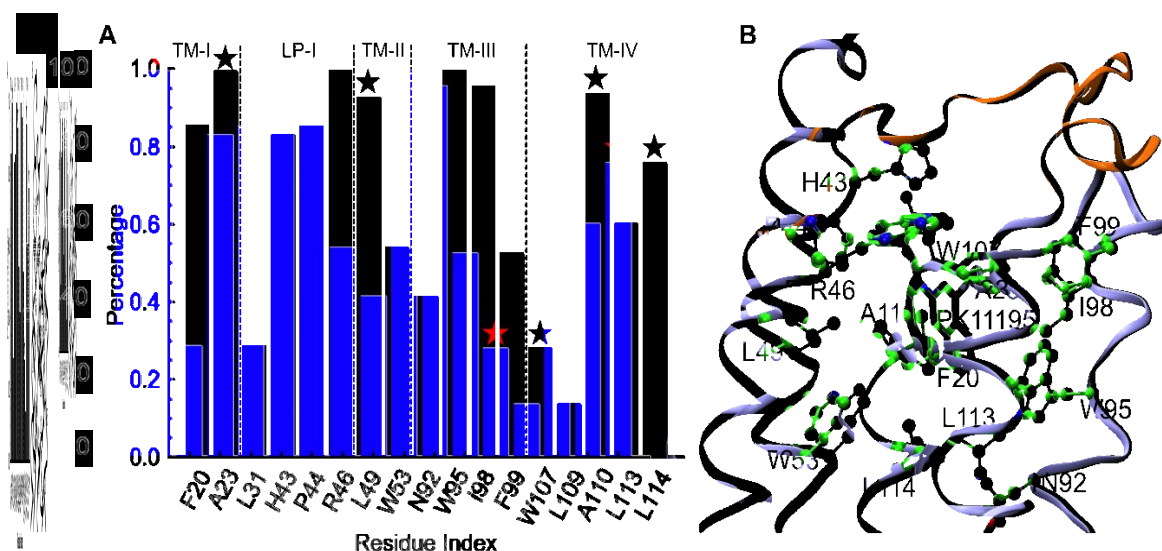

**Figure S10.** (A) Percentage of the contacts between PK11195 and holo mTSPO\_NMR\_monomer occurring during the simulation. Only residues with a percentage of contact larger than 10% of the entire simulation time are shown. The residues interacting with PK11195 in the deposited NMR ensemble with PDBiD: 2MGY [9] are marked by red stars. (B) The 3D structure of the binding pocket of mTSPO\_NMR\_monomer, as emerging from our MD simulation. The most populated cluster is shown. PK11195 and the protein residues are licorice and ball-stick, respectively. The LP-I loop is highlighted in orange cartoon, while the rest of the protein is in cyan.

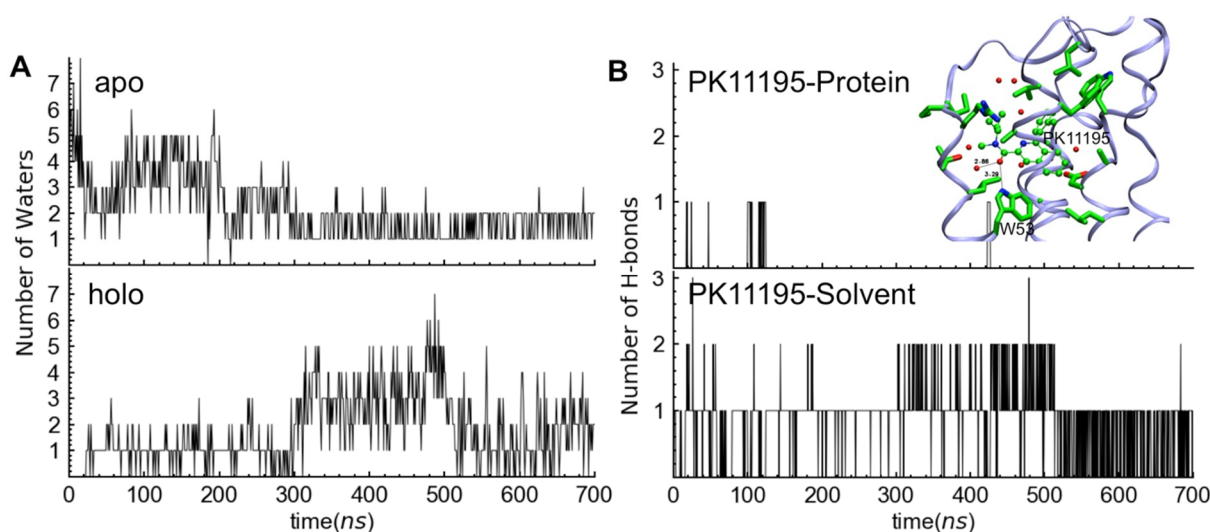

**Figure S11.** The number of water molecules (A) and of H-bonds (B) in the binding pocket of apo and holo is plotted as a function of the simulated time. In the inset figure, PK11195 and the protein residues in the MD representative structure are in ball-stick and licorice, respectively. Water molecules and H-bonds are represented by red spheres and dotted lines, respectively.

### Supplementary References

- Larson, S.M., Di Nardo, A.A., and Davidson, A.R., Analysis of covariation in an SH3 domain sequence alignment: applications in tertiary contact prediction and the design of compensating hydrophobic core substitutions. *J. Mol. Biol.*, **2000**, 303, 433-446, doi: 10.1006/jmbi.2000.4146.
- Sievers, F. and Higgins Desmond, G., Clustal Omega for making accurate alignments of many protein sequences. *Protein Sci.*, **2017**, 27, 135-145, doi: 10.1002/pro.3290.
- Baker, F.N. and Porollo, A., CoeViz: a web-based tool for coevolution analysis of protein residues. *BMC Bioinformatics*, **2016**, 17, 119-119, doi: 10.1186/s12859-016-0975-z.

4. Bennet, S.A., Cohen, M.A., and Gonnet, G.H., Amino acid substitution during functionally constrained divergent evolution of protein sequences. *Protein Eng. Des. Sel.*, **1994**, *7*, 1323-1332, doi: 10.1093/protein/7.11.1323.
5. Lomize, M.A., et al., OPM database and PPM web server: resources for positioning of proteins in membranes. *Nucleic Acids Res.*, **2012**, *40*, D370-D376, doi: 10.1093/nar/gkr703.
6. Lomize Andrei, L., et al., Positioning of proteins in membranes: A computational approach. *Protein Sci.*, **2009**, *15*, 1318-1333, doi: 10.1110/ps.062126106.
7. Zimmermann, L., et al., A Completely Reimplemented MPI Bioinformatics Toolkit with a New HHpred Server at its Core. *J. Mol. Biol.*, **2017**, doi: 10.1016/j.jmb.2017.12.007.
8. Jaipuria, G., et al., Cholesterol-mediated allosteric regulation of the mitochondrial translocator protein structure. *Nat. Commun.*, **2017**, *8*, 14893, doi: 10.1038/ncomms14893.
9. Jaremko, L., et al., Structure of the Mitochondrial Translocator Protein in Complex with a Diagnostic Ligand. *Science*, **2014**, *343*, 1363-1366, doi: 10.1126/science.1248725.
10. Li, F., et al., Crystal Structures of Translocator Protein (TSPO) and Mutant Mimic of a Human Polymorphism. *Science*, **2015**, *347*, 555-558, doi: 10.1126/science.1260590.
11. Guo, Y., et al., Structure and Activity of Tryptophan-rich TSPO Proteins. *Science*, **2015**, *347*, 551-555, doi: 10.1126/science.aaa1534.
12. Trapani, A., et al., Targeting of the Translocator Protein 18 kDa (TSPO): A Valuable Approach for Nuclear and Optical Imaging of Activated Microglia. *Bioconjugate Chem.*, **2013**, *24*, 1415-1428, doi: 10.1021/bc300666f.
13. Chemical Computing Group, U.L.C., *Molecular Operating Environment (MOE)*. 2017: Montreal, QC, Canada.
14. Corbeil, C.R., Williams, C.I., and Labute, P., Variability in docking success rates due to dataset preparation. *J. Comput. Aided Mol. Des.*, **2012**, *26*, 775-786, doi: 10.1007/s10822-012-9570-1.
15. Studer, G., Biasini, M., and Schwede, T., Assessing the local structural quality of transmembrane protein models using statistical potentials (QMEANBrane). *Bioinformatics*, **2014**, *30*, i505-i511, doi: 10.1093/bioinformatics/btu457.
16. Caliendo, R., Rossetti, G., and Carloni, P., Local Fluctuations and Conformational Transitions in Proteins. *J. Chem. Theory Comput.*, **2012**, *8*, 4775-85, doi: 10.1021/ct300610y.
